# Supplementary material
Source: publisher figshare collection journal article supplement (https://springernature.figshare.com/ndownloader/files/17627486)
Supplement: Supplementary file [file 17627486]

**Table 1.** Information for Reporting Randomized Controlled Trials With Patient reported Outcomes

| Section/Topic                                        | Item | CONSORT 2010 Statement Checklist Item                                                                                                                                                       | PRO-Specific Extensions Are Prefaced by the letter P                                                                                                                                                           |
|------------------------------------------------------|------|---------------------------------------------------------------------------------------------------------------------------------------------------------------------------------------------|----------------------------------------------------------------------------------------------------------------------------------------------------------------------------------------------------------------|
| <b>Title and Abstract</b>                            |      |                                                                                                                                                                                             |                                                                                                                                                                                                                |
|                                                      | 1a   | Identification as a randomized trial in the title                                                                                                                                           |                                                                                                                                                                                                                |
|                                                      | 1b   | Structured summary of trial design, methods, results, and conclusions (for specific guidance see CONSORT for abstracts) <sup>7</sup>                                                        | P1b: The PRO should be identified in the abstract as a primary or secondary outcome                                                                                                                            |
| <b>Introduction</b>                                  |      |                                                                                                                                                                                             |                                                                                                                                                                                                                |
| Background and objectives                            | 2a   | Scientific background and explanation of rationale                                                                                                                                          | Including background and rationale for PRO assessment                                                                                                                                                          |
|                                                      | 2b   | Specific objectives or hypotheses                                                                                                                                                           | P2b: The PRO hypothesis should be stated and relevant domains identified, if applicable                                                                                                                        |
| <b>Methods</b>                                       |      |                                                                                                                                                                                             |                                                                                                                                                                                                                |
| Trial design                                         | 3a   | Description of trial design (such as parallel, factorial), including allocation ratio                                                                                                       |                                                                                                                                                                                                                |
|                                                      | 3b   | Important changes to methods after trial commencement (such as eligibility criteria), with reasons                                                                                          |                                                                                                                                                                                                                |
| Participants                                         | 4a   | Eligibility criteria for participants                                                                                                                                                       | Not PRO-specific, unless the PROs were used in eligibility or stratification criteria                                                                                                                          |
|                                                      | 4b   | Settings and locations where the data were collected                                                                                                                                        |                                                                                                                                                                                                                |
| Interventions                                        | 5    | The interventions for each group with sufficient details to allow replication, including how and when they were actually administered                                                       |                                                                                                                                                                                                                |
| Outcomes                                             | 6a   | Completely defined prespecified primary and secondary outcome measures, including how and when they were assessed                                                                           | P6a: Evidence of PRO instrument validity and reliability should be provided or cited if available including the person completing the PRO and methods of data collection (paper, telephone, electronic, other) |
|                                                      | 6b   | Any changes to trial outcomes after the trial commenced, with reasons                                                                                                                       |                                                                                                                                                                                                                |
| Sample size                                          | 7a   | How sample size was determined                                                                                                                                                              | Not required for PRO unless it is a primary study outcome                                                                                                                                                      |
|                                                      | 7b   | When applicable, explanation of any interim analyses and stopping guidelines                                                                                                                |                                                                                                                                                                                                                |
| <b>Randomization</b>                                 |      |                                                                                                                                                                                             |                                                                                                                                                                                                                |
| Sequence generation                                  | 8a   | Method used to generate the random allocation sequence                                                                                                                                      |                                                                                                                                                                                                                |
|                                                      | 8b   | Type of randomization; details of any restriction (such as blocking and block size)                                                                                                         |                                                                                                                                                                                                                |
| Allocation concealment mechanism                     | 9    | Mechanism used to implement the random allocation sequence (such as sequentially numbered containers), describing any steps taken to conceal the sequence until interventions were assigned |                                                                                                                                                                                                                |
| Implementation                                       | 10   | Who generated the random allocation sequence, who enrolled participants, and who assigned participants to interventions                                                                     |                                                                                                                                                                                                                |
| Blinding                                             | 11a  | If done, who was blinded after assignment to interventions (for example, participants, care providers, those assessing outcomes) and how                                                    |                                                                                                                                                                                                                |
|                                                      | 11b  | If relevant, description of the similarity of interventions                                                                                                                                 |                                                                                                                                                                                                                |
| Statistical methods                                  | 12a  | Statistical methods used to compare groups for primary and secondary outcomes                                                                                                               | P12a: Statistical approaches for dealing with missing data are explicitly stated                                                                                                                               |
|                                                      | 12b  | Methods for additional analyses, such as subgroup analyses and adjusted analyses                                                                                                            |                                                                                                                                                                                                                |
| <b>Results</b>                                       |      |                                                                                                                                                                                             |                                                                                                                                                                                                                |
| Participant flow (a diagram is strongly recommended) | 13a  | For each group, the numbers of participants who were randomly assigned, received intended treatment, and were analyzed for the primary outcome                                              | The number of PRO outcome data at baseline and at subsequent time points should be made transparent                                                                                                            |
|                                                      | 13b  | For each group, losses and exclusions after randomization, together with reasons                                                                                                            |                                                                                                                                                                                                                |
| Recruitment                                          | 14a  | Dates defining the periods of recruitment and follow-up                                                                                                                                     |                                                                                                                                                                                                                |
|                                                      | 14b  | Why the trial ended or was stopped                                                                                                                                                          |                                                                                                                                                                                                                |
| Baseline data                                        | 15   | A table showing baseline demographic and clinical characteristics for each group                                                                                                            | Including baseline PRO data when collected                                                                                                                                                                     |
| Numbers analyzed                                     | 16   | For each group, number of participants (denominator) included in each analysis and whether the analysis was by original assigned groups                                                     | Required for PRO results                                                                                                                                                                                       |
| Outcomes and estimation                              | 17a  | For each primary and secondary outcome, results for each group, the estimated effect size, and its precision (such as 95% confidence interval)                                              | For multidimensional PRO results from each domain and time point                                                                                                                                               |
|                                                      | 17b  | For binary outcomes, presentation of both absolute and relative effect sizes is recommended                                                                                                 |                                                                                                                                                                                                                |
| Ancillary analyses                                   | 18   | Results of any other analyses performed, including subgroup analyses and adjusted analyses, distinguishing prespecified from exploratory                                                    | Including PRO analyses, where relevant                                                                                                                                                                         |
| Harms                                                | 19   | All important harms or unintended effects in each group (for specific guidance see CONSORT for harms)                                                                                       |                                                                                                                                                                                                                |
| <b>Discussion</b>                                    |      |                                                                                                                                                                                             |                                                                                                                                                                                                                |
| Limitations                                          | 20   | Trial limitations, addressing sources of potential bias, imprecision, and, if relevant, multiplicity of analyses                                                                            | P20/21: PRO-specific limitations and implications for generalizability and clinical practice                                                                                                                   |
| Generalizability                                     | 21   | Generalizability (external validity, applicability) of the trial findings                                                                                                                   |                                                                                                                                                                                                                |
| Interpretation                                       | 22   | Interpretation consistent with results, balancing benefits and harms, and considering other relevant evidence                                                                               | PRO data should be interpreted in relation to clinical outcomes including survival data, where relevant                                                                                                        |
| <b>Other Information</b>                             |      |                                                                                                                                                                                             |                                                                                                                                                                                                                |
| Registration                                         | 23   | Registration number and name of trial registry                                                                                                                                              |                                                                                                                                                                                                                |
| Protocol                                             | 24   | Where the full trial protocol can be accessed, if available                                                                                                                                 |                                                                                                                                                                                                                |
| Funding                                              | 25   | Sources of funding and other support (such as supply of drugs), role of funders                                                                                                             |                                                                                                                                                                                                                |

Page 1

Page 1-2

Page 3-4

Page 4-5

Page 5

N/A

Page 5

Page 6

Page 6-8

Page 8-9

N/A

Page 10

N/A

Page 6

Page 6

Page 5-6

Page 6

Page 6

N/A

Page 10-11

Page 11

Figure 1

Figure 1

Page 12

N/A

Table 1

Figure 1 +

Table 2 and 3

Page 12-13 +

Table 2 and 3

N/A

Page 13-14

N/A

Page 15-17

Page 16

Page 15-17

In Abstract

Page 18

Page 18

Reproduced from *Reporting of Patient-Reported outcomes in Randomized Trials: The CONSORT PRO Extension*. JAMA, February 27, 2013\_Vol309(8)

Copyright © 2013 American Medical association. All rights reserved."
